# Supplementary material
Source: PubMed Central journal article supplement (PMC4927362)
Supplement: NIHMS790133-supplement-2.pdf [file NIHMS790133-supplement-2.pdf]

## SUPPLEMENTAL FIGURE LEGENDS

### Figure S1. Corticosterone, ER stress, body composition and whole body bioenergetics of Cpt2<sup>lox/lox</sup> and Cpt2<sup>L-/-</sup> mice, related to Figure 2.

- (A) Respiratory exchange ratio and energy expenditure in fed fast and refed Cpt2<sup>lox/lox</sup> and Cpt2<sup>L-/-</sup> female mice (n=6).
- (B) Total fat and lean mass of Cpt2<sup>lox/lox</sup> and Cpt2<sup>L-/-</sup> female mice (n=6).
- (C) Ambulatory activity and food intake during fed, fast and refed Cpt2<sup>lox/lox</sup> and Cpt2<sup>L-/-</sup> female mice (n=6).
- (D) Ambulatory activity and food intake during fed, fast and refed Cpt2<sup>lox/lox</sup> and Cpt2<sup>L-/-</sup> male mice (n=5-7).
- (E) Serum concentration of Corticosterone in fed, 24 hr fasted and ketogenic diet-fed Cpt2<sup>lox/lox</sup> and Cpt2<sup>L-/-</sup> male mice (n=5).
- (F) Gene expression of *Atf4*, *Chop*, *Xbp(s)* and *Xbp(t)* in the liver of fed, 24 hr fasted and ketogenic diet-fed Cpt2<sup>lox/lox</sup> and Cpt2<sup>L-/-</sup> male mice (n=6).

Data are expressed as mean ± SEM. \*p<0.05; \*\*p<0.01; \*\*\*p<0.001.

### Figure S2. The loss of liver fatty acid oxidation alters fatty acid metabolism in the liver, related to Figure 3.

- (A) Gene expression of *de novo* fatty acid biosynthesis genes of fed and 24 hr fasted Cpt2<sup>lox/lox</sup> and Cpt2<sup>L-/-</sup> mice (n=6).
- (B) Western blots of proteins involved in hepatic fatty acid metabolism with Hsc70 as loading control from the composite Figure 3B.

Data are expressed as mean ± SEM. \*p<0.05; \*\*p<0.01; \*\*\*p<0.001.

### Figure S3. Gluconeogenic gene expression, cardiac and kidney fatty acid metabolism, related to Figure 4.

- (A) Gene expression of gluconeogenic genes *Pck1*, *Pck2*, *G6pase* and *Pcx* in liver of fed and 24 hr fasted Cpt2<sup>lox/lox</sup> and Cpt2<sup>L-/-</sup> mice (n=6).
- (B) Gene expression of gluconeogenic genes *Pck1*, *Pck2*, *G6pase* and *Pcx* in kidney of fed and 24 hr fasted Cpt2<sup>lox/lox</sup> and Cpt2<sup>L-/-</sup> mice (n=6).
- (C) Gene expression of fatty acid oxidation genes in the heart of fed and 24 hr fasted Cpt2<sup>lox/lox</sup> and Cpt2<sup>L-/-</sup> mice (n=6).
- (D) Western blots of proteins involved in kidney fatty acid metabolism with Hsc70 as loading control from the composite Figure 4B.

Data are expressed as mean ± SEM. \*p<0.05; \*\*p<0.01; \*\*\*p<0.001.

**Figure S4. A ketogenic diet results in compensation from kidney, gastrocnemius muscle and heart, related to Figure 5.**

- (A) Gene expression of gluconeogenic genes *Pck1*, *Pck2*, and *G6pase* in liver of  $Cpt2^{lox/lox}$  and  $Cpt2^{L-/-}$  mice fed a ketogenic diet (n=6).
- (B) Gene expression of gluconeogenic genes *Pck1*, *Pck2*, and *G6pase* in kidney of  $Cpt2^{lox/lox}$  and  $Cpt2^{L-/-}$  mice fed a ketogenic diet (n=6).
- (C) Serum concentrations of insulin in  $Cpt2^{lox/lox}$  and  $Cpt2^{L-/-}$  mice fed a ketogenic diet (n=5-7).
- (D) Gene expression of fatty acid oxidation genes in kidney of  $Cpt2^{lox/lox}$  and  $Cpt2^{L-/-}$  mice fed a ketogenic diet (n=6).
- (E) Gene expression of fatty acid oxidation genes in gastrocnemius muscle of  $Cpt2^{lox/lox}$  and  $Cpt2^{L-/-}$  mice fed a ketogenic diet (n=6).
- (F) Gene expression of fatty acid oxidation genes in heart of  $Cpt2^{lox/lox}$  and  $Cpt2^{L-/-}$  mice fed a ketogenic diet (n=6).

Data are expressed as mean  $\pm$  SEM. \*p<0.05; \*\*p<0.01; \*\*\*p<0.001.

**Table S1. Daily blood acylcarnitine profile of  $Cpt2^{lox/lox}$  and  $Cpt2^{L-/-}$  mice fed a chow diet then a ketogenic diet for 4 days, related to Figure 6.**

**Table S2. Liver acylcarnitine profile of  $Cpt2^{lox/lox}$  and  $Cpt2^{L-/-}$  mice fed a chow diet or a ketogenic diet for 4 days, related to Figure 6.**

# Figure S1

**Lox/Lox**  
 **Cpt2<sup>L-/-</sup>**

## FEMALES

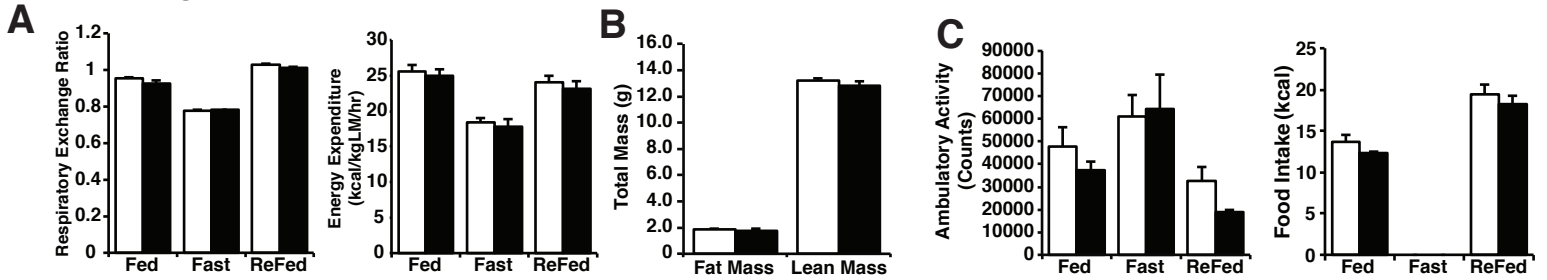

## MALES

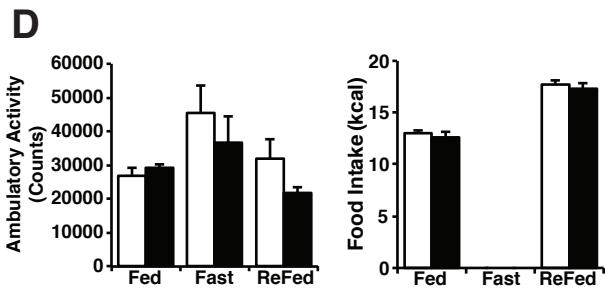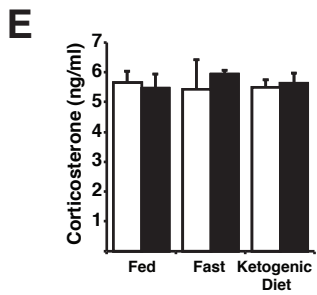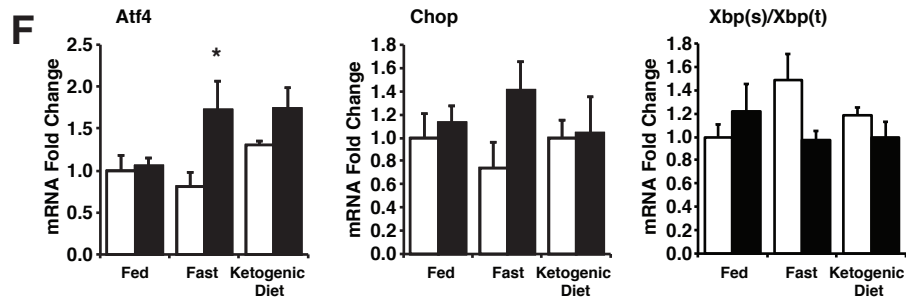

**Figure S2**

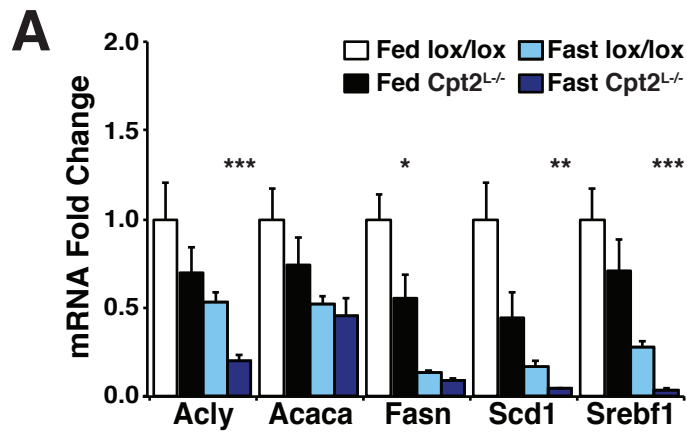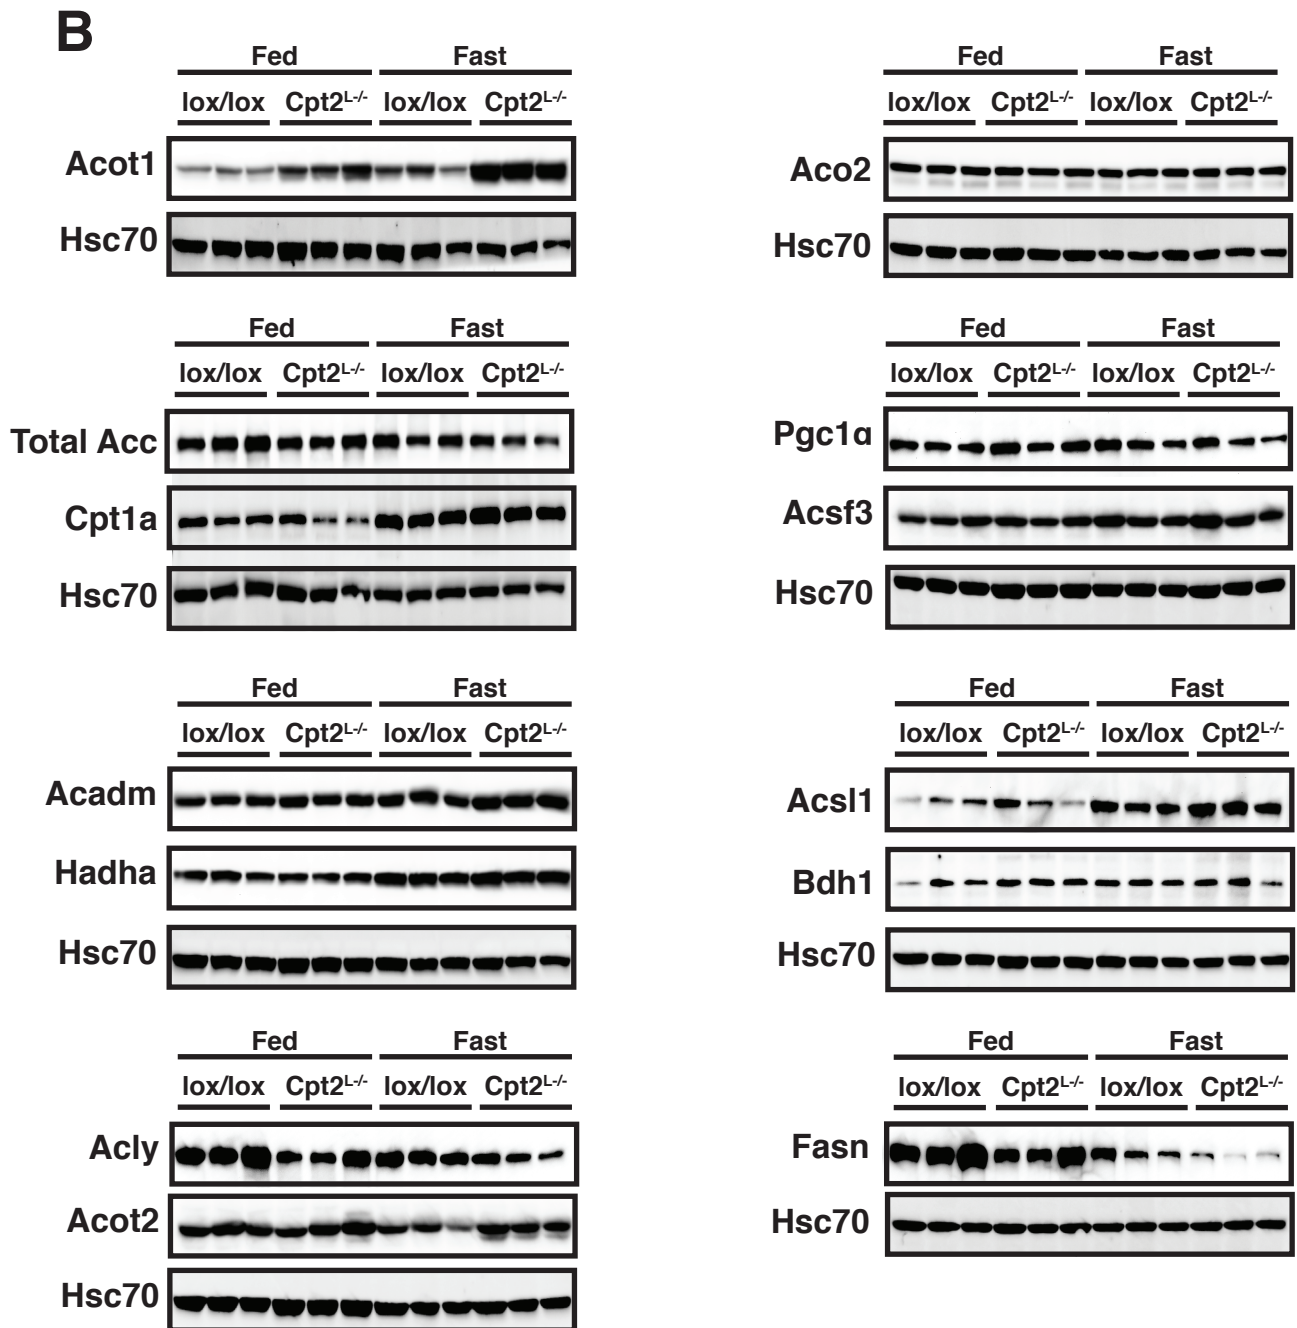

**Figure S3**

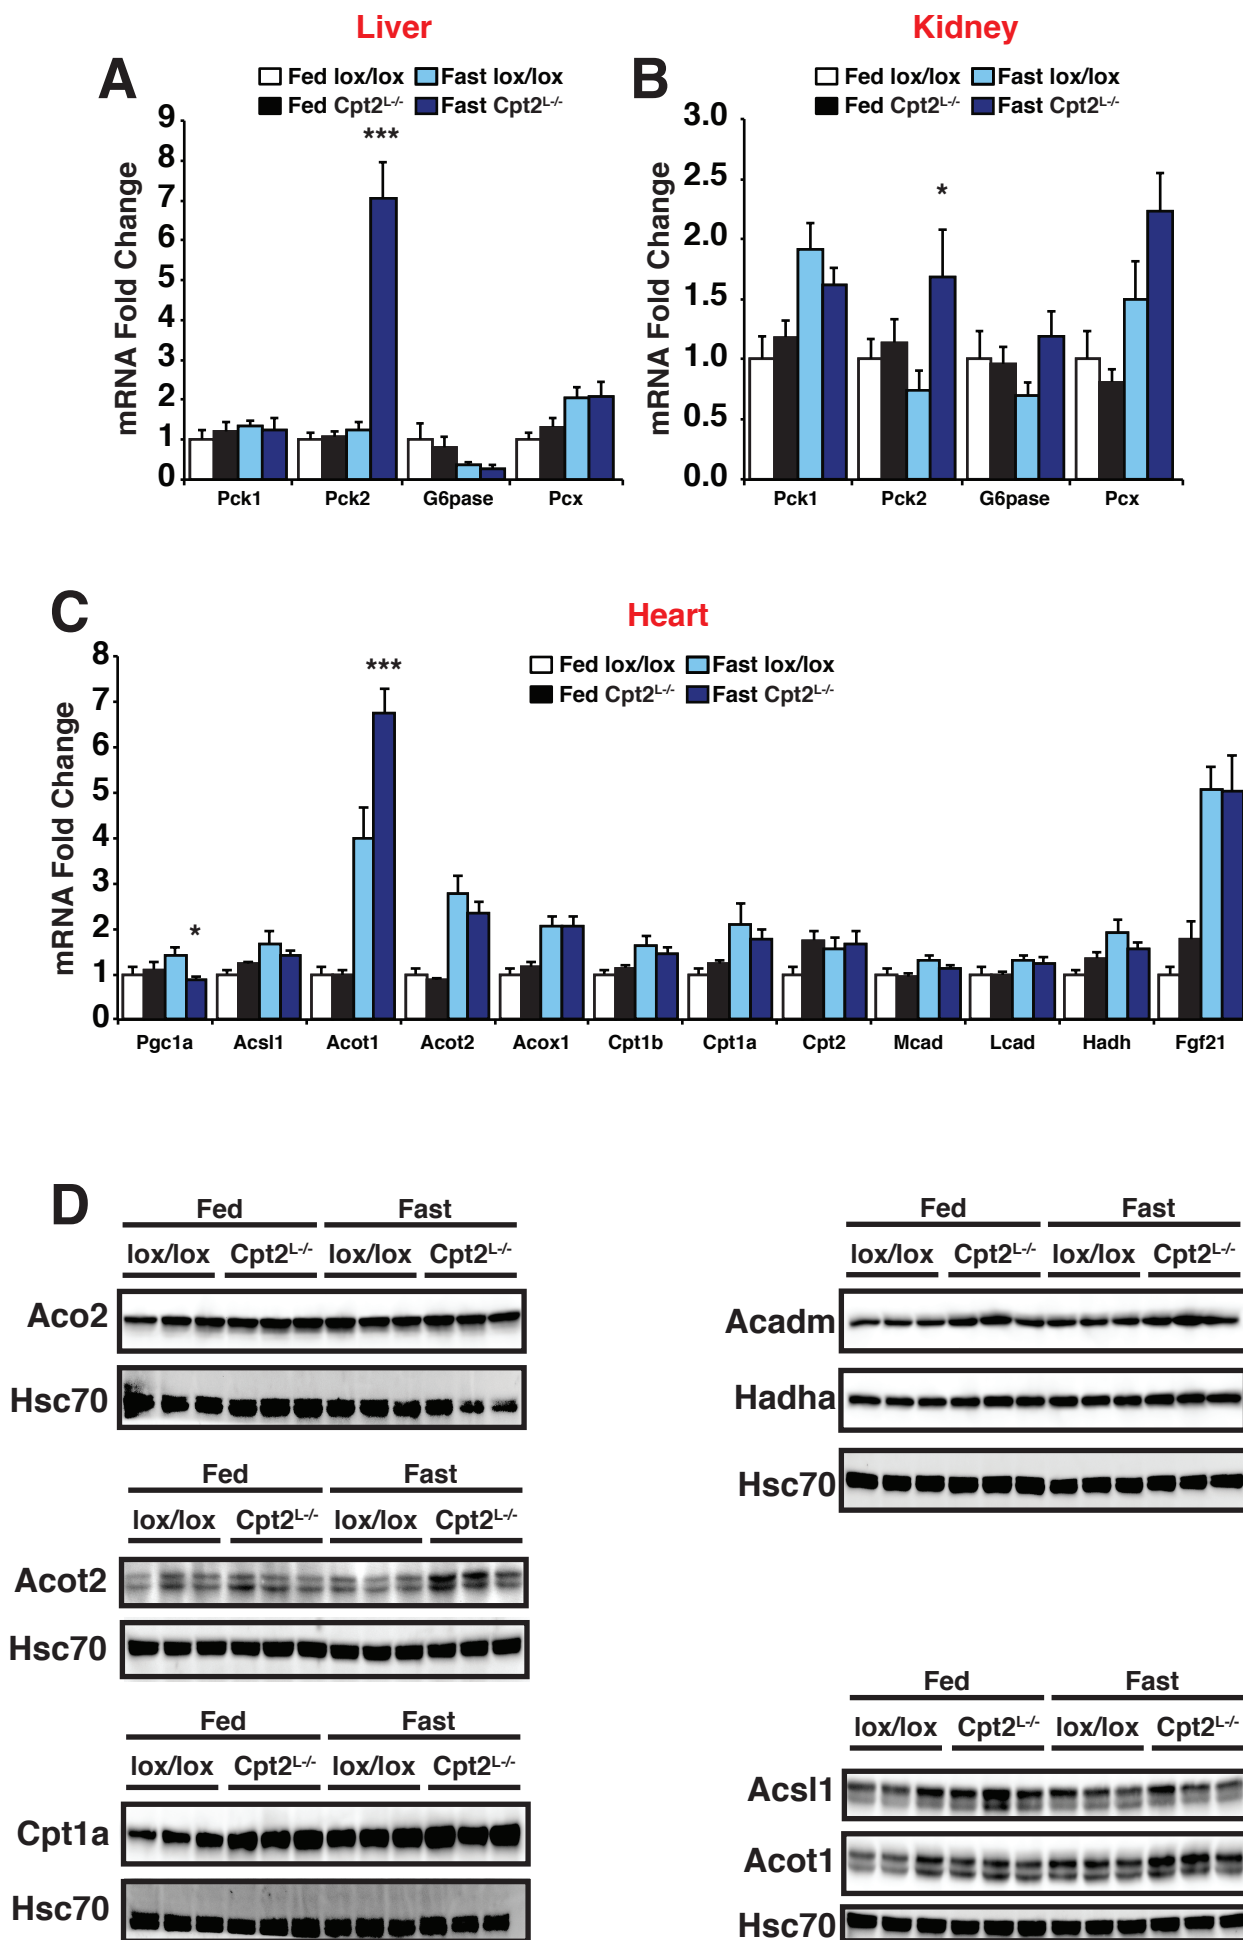

# Figure S4

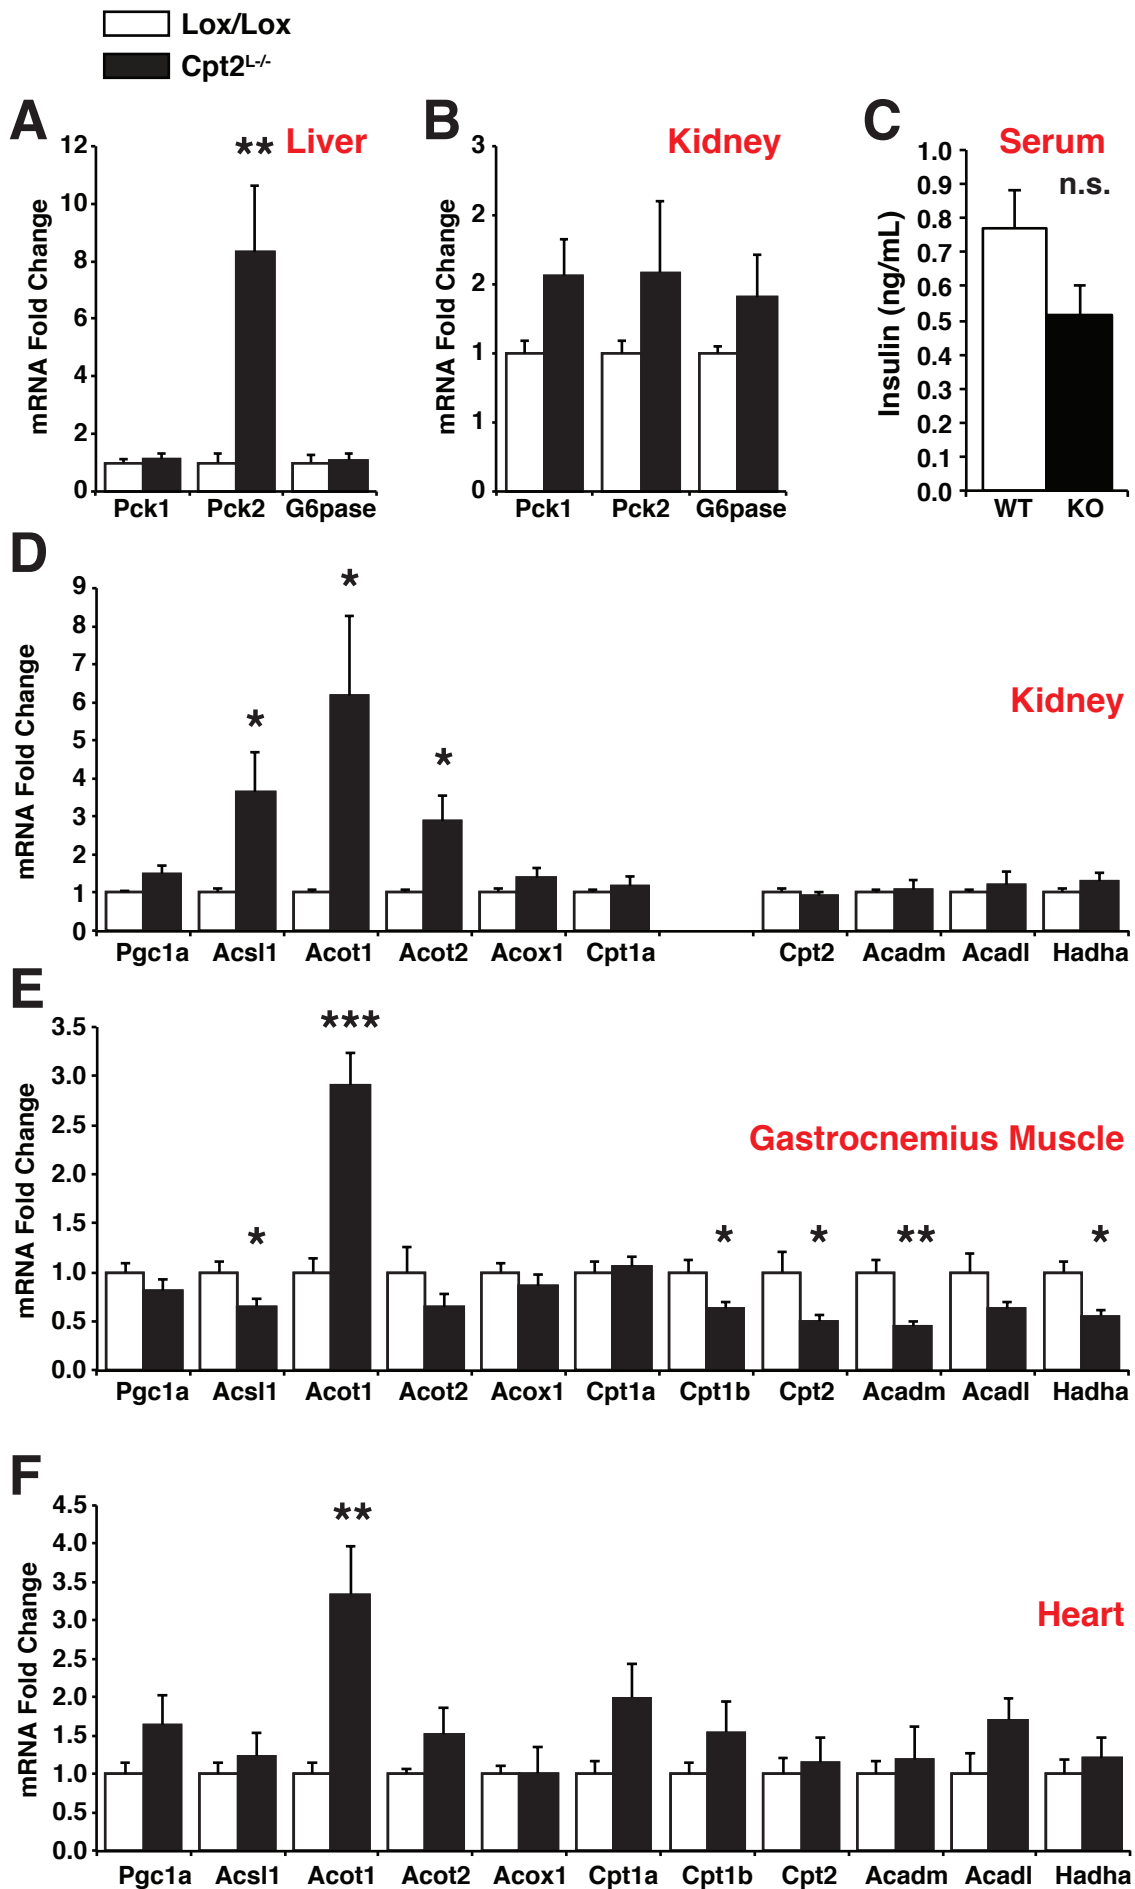

Supplemental Table 1. Daily blood acylcarnitine profile of Cpt2lox/lox and Cpt2L-/- mice fed a chow diet then a ketogenic diet for 4 days.

| Acylcarnitines<br>(nmol/ml) | Lox/Lox        |                   |                    |                    |                    | Cpt2L-/-           |                    |                    |                    |                     |
|-----------------------------|----------------|-------------------|--------------------|--------------------|--------------------|--------------------|--------------------|--------------------|--------------------|---------------------|
|                             | Chow           | 1                 | 2                  | 3                  | 4                  | Chow               | 1                  | 2                  | 3                  | 4                   |
| Total                       | 27.406 ± 2.206 | 26.094 ± 2.42     | 20.704 ± 1.351     | 21.222 ± 1.877§    | 23.928 ± 2.42§     | 7.15 ± 0.571#####  | 8.366 ± 0.96#####  | 9.27 ± 1.242#####  | 9.53 ± 0.675#####  | 10.616 ± 1.357##### |
| C0                          | 29.424 ± 3.309 | 17.332 ± 1.97§§§§ | 15.672 ± 2.025§§§§ | 16.672 ± 0.729§§§§ | 16.278 ± 1.634§§§§ | 4.478 ± 0.576##### | 3.56 ± 0.633#####  | 4.005 ± 0.416##### | 3.748 ± 0.259##### | 3.803 ± 0.337#####  |
| C2                          | 21.616 ± 2.423 | 19.296 ± 2.344    | 14.884 ± 0.989§§§  | 15.604 ± 1.234§§   | 17.858 ± 1.795     | 3.458 ± 0.3#####   | 3.538 ± 0.579##### | 2.948 ± 0.151##### | 2.964 ± 0.391##### | 3.024 ± 0.344#####  |
| C3                          | 0.644 ± 0.084  | 0.896 ± 0.141     | 0.684 ± 0.057      | 0.658 ± 0.078§     | 0.57 ± 0.099§      | 0.066 ± 0.005##### | 0.172 ± 0.021##### | 0.114 ± 0.007##### | 0.088 ± 0.006##### | 0.076 ± 0.015#####  |
| C3-DC                       | 0.142 ± 0.031  | 0.118 ± 0.015     | 0.154 ± 0.013      | 0.11 ± 0.026       | 0.134 ± 0.015      | 0.06 ± 0.01##      | 0.052 ± 0.008#     | 0.082 ± 0.01#      | 0.05 ± 0.007       | 0.074 ± 0.01        |
| C4                          | 0.47 ± 0.106   | 0.332 ± 0.038     | 0.31 ± 0.039       | 0.328 ± 0.048      | 0.354 ± 0.038      | 0.166 ± 0.036##### | 0.206 ± 0.031      | 0.238 ± 0.025      | 0.254 ± 0.032      | 0.274 ± 0.057       |
| C4-OH                       | 0.23 ± 0.017   | 0.284 ± 0.014     | 0.328 ± 0.048      | 0.376 ± 0.079§§    | 0.44 ± 0.054§§     | 0.058 ± 0.015##    | 0.102 ± 0.018##    | 0.084 ± 0.017##    | 0.112 ± 0.017##    | 0.09 ± 0.006*,####  |
| C4-DC                       | 0.098 ± 0.011  | 0.098 ± 0.016     | 0.086 ± 0.005      | 0.112 ± 0.025      | 0.112 ± 0.032      | 0.048 ± 0.007      | 0.05 ± 0.013       | 0.05 ± 0.007       | 0.046 ± 0.005##    | 0.036 ± 0.004##     |
| C5:1                        | 0.014 ± 0.002  | 0.016 ± 0.002     | 0.02 ± 0.006       | 0.022 ± 0.006      | 0.018 ± 0.006      | 0.026 ± 0.008      | 0.012 ± 0.004      | 0.022 ± 0.006      | 0.012 ± 0.002      | 0.268 ± 0.241       |
| C5                          | 0.066 ± 0.006  | 0.062 ± 0.011     | 0.068 ± 0.024      | 0.096 ± 0.004      | 0.07 ± 0.005       | 0.024 ± 0.006#     | 0.026 ± 0.005      | 0.024 ± 0.004#     | 0.032 ± 0.006#     | 0.038 ± 0.007       |
| C5-OH                       | 0.088 ± 0.01   | 0.082 ± 0.008     | 0.062 ± 0.009      | 0.074 ± 0.01       | 0.098 ± 0.015      | 0.026 ± 0.005##### | 0.028 ± 0.006##### | 0.036 ± 0.005      | 0.034 ± 0.006##    | 0.028 ± 0.002#####  |
| C5-DC/C10-OH                | 0.026 ± 0.002  | 0.028 ± 0.006     | 0.032 ± 0.005      | 0.032 ± 0.006      | 0.034 ± 0.004      | 0.01 ± 0           | 0.022 ± 0.005      | 0.018 ± 0.004      | 0.028 ± 0.007      | 0.026 ± 0.008       |
| C6                          | 0.086 ± 0.012  | 0.098 ± 0.019     | 0.076 ± 0.005      | 0.084 ± 0.012      | 0.104 ± 0.018      | 0.052 ± 0.007      | 0.052 ± 0.008#     | 0.042 ± 0.002      | 0.062 ± 0.012      | 0.044 ± 0.007##     |
| C8:1                        | 0.042 ± 0.007  | 0.028 ± 0.004     | 0.032 ± 0.004      | 0.03 ± 0.004       | 0.036 ± 0.012      | 0.028 ± 0.002      | 0.024 ± 0.006      | 0.028 ± 0.006      | 0.026 ± 0.007      | 0.03 ± 0.005        |
| C8                          | 0.09 ± 0.023   | 0.084 ± 0.009     | 0.07 ± 0.008       | 0.092 ± 0.012      | 0.124 ± 0.035      | 0.038 ± 0.006      | 0.028 ± 0.004      | 0.022 ± 0.002      | 0.034 ± 0.007#     | 0.032 ± 0.004###    |
| C10:1                       | 0.122 ± 0.053  | 0.074 ± 0.011     | 0.058 ± 0.01       | 0.102 ± 0.03       | 0.114 ± 0.023      | 0.042 ± 0.004      | 0.052 ± 0.009      | 0.052 ± 0.013      | 0.044 ± 0.009      | 0.068 ± 0.012       |
| C10                         | 0.052 ± 0.009  | 0.054 ± 0.009§    | 0.06 ± 0.003       | 0.064 ± 0.008      | 0.09 ± 0.018*,§    | 0.026 ± 0.007      | 0.036 ± 0.008      | 0.028 ± 0.005      | 0.02 ± 0.003##     | 0.032 ± 0.005####   |
| C12:1                       | 0.032 ± 0.002  | 0.028 ± 0.004     | 0.03 ± 0.004       | 0.036 ± 0.006      | 0.034 ± 0.009      | 0.024 ± 0.006      | 0.028 ± 0.006      | 0.018 ± 0.004      | 0.024 ± 0.005      | 0.016 ± 0.004       |
| C12                         | 0.108 ± 0.02   | 0.098 ± 0.019     | 0.08 ± 0.006       | 0.122 ± 0.031      | 0.098 ± 0.014      | 0.056 ± 0.012      | 0.052 ± 0.008      | 0.048 ± 0.006      | 0.062 ± 0.006#     | 0.062 ± 0.007       |
| C12:1-OH                    | 0.04 ± 0.015   | 0.026 ± 0.002     | 0.024 ± 0.005      | 0.038 ± 0.021      | 0.022 ± 0.004      | 0.018 ± 0.004      | 0.018 ± 0.004      | 0.02 ± 0.004       | 0.022 ± 0.004      | 0.018 ± 0.004       |
| C12-OH                      | 0.03 ± 0.01    | 0.026 ± 0.002     | 0.034 ± 0.008      | 0.026 ± 0.006      | 0.03 ± 0.003       | 0.008 ± 0.002#     | 0.012 ± 0.002      | 0.016 ± 0.005      | 0.012 ± 0.002      | 0.014 ± 0.002       |
| C14:2                       | 0.05 ± 0.014   | 0.036 ± 0.009     | 0.028 ± 0.005      | 0.034 ± 0.007      | 0.036 ± 0.005      | 0.044 ± 0.007      | 0.024 ± 0.002      | 0.03 ± 0.007       | 0.036 ± 0.005      | 0.036 ± 0.004       |
| C14:1                       | 0.104 ± 0.025  | 0.108 ± 0.008     | 0.096 ± 0.012      | 0.122 ± 0.023      | 0.102 ± 0.014      | 0.084 ± 0.009      | 0.056 ± 0.009      | 0.062 ± 0.008      | 0.096 ± 0.017      | 0.062 ± 0.011       |
| C14                         | 0.172 ± 0.008* | 0.304 ± 0.048     | 0.256 ± 0.025      | 0.264 ± 0.063      | 0.222 ± 0.033      | 0.14 ± 0.016       | 0.138 ± 0.014#     | 0.136 ± 0.012#     | 0.168 ± 0.024      | 0.158 ± 0.02        |
| C14:1-OH                    | 0.034 ± 0.005  | 0.05 ± 0.011      | 0.038 ± 0.008      | 0.052 ± 0.008      | 0.04 ± 0.007       | 0.024 ± 0.005      | 0.024 ± 0.005      | 0.024 ± 0.005      | 0.034 ± 0.005      | 0.024 ± 0.01        |
| C14-OH                      | 0.046 ± 0.015  | 0.048 ± 0.004     | 0.038 ± 0.002      | 0.06 ± 0.013       | 0.058 ± 0.006      | 0.018 ± 0.004#     | 0.016 ± 0.002#     | 0.014 ± 0.002      | 0.016 ± 0.002###   | 0.016 ± 0.004###    |
| C16:1                       | 0.122 ± 0.007  | 0.162 ± 0.032     | 0.11 ± 0.017       | 0.12 ± 0.027       | 0.126 ± 0.025      | 0.174 ± 0.017      | 0.14 ± 0.01        | 0.148 ± 0.026      | 0.198 ± 0.03       | 0.176 ± 0.025       |
| C16                         | 1.424 ± 0.041  | 1.392 ± 0.3       | 1.158 ± 0.139      | 0.996 ± 0.142      | 1.144 ± 0.136      | 0.942 ± 0.124      | 1.368 ± 0.129      | 1.726 ± 0.329      | 1.688 ± 0.211      | 2.012 ± 0.382*,#    |
| C16:1-OH                    | 0.062 ± 0.01   | 0.09 ± 0.014      | 0.076 ± 0.014      | 0.074 ± 0.019      | 0.092 ± 0.018      | 0.038 ± 0.009      | 0.064 ± 0.01§      | 0.108 ± 0.017*     | 0.114 ± 0.013*     | 0.148 ± 0.034***    |
| C16-OH                      | 0.054 ± 0.007* | 0.07 ± 0.008      | 0.08 ± 0.008       | 0.074 ± 0.015      | 0.094 ± 0.024      | 0.018 ± 0.002      | 0.014 ± 0.004##    | 0.024 ± 0.007##    | 0.02 ± 0.003##     | 0.022 ± 0.004##     |
| C18:2                       | 0.254 ± 0.021  | 0.278 ± 0.05      | 0.216 ± 0.031      | 0.158 ± 0.023      | 0.226 ± 0.038      | 0.214 ± 0.027      | 0.214 ± 0.013      | 0.258 ± 0.046      | 0.274 ± 0.056      | 0.292 ± 0.058       |
| C18:1                       | 0.586 ± 0.012  | 1.01 ± 0.198      | 0.736 ± 0.081      | 0.552 ± 0.07       | 0.706 ± 0.113      | 0.714 ± 0.087      | 0.866 ± 0.065§     | 1.278 ± 0.316      | 1.336 ± 0.204#     | 1.66 ± 0.44*,§§,§   |
| C18                         | 0.378 ± 0.017  | 0.69 ± 0.1        | 0.674 ± 0.094      | 0.598 ± 0.052#     | 0.588 ± 0.098###   | 0.462 ± 0.04       | 0.876 ± 0.136§     | 1.5 ± 0.323**      | 1.554 ± 0.192**    | 1.918 ± 0.563****   |
| C18:2-OH                    | 0.032 ± 0.012  | 0.024 ± 0.004     | 0.016 ± 0.002      | 0.014 ± 0.005      | 0.024 ± 0.005      | 0.016 ± 0.004      | 0.014 ± 0.002      | 0.022 ± 0.006      | 0.014 ± 0.002      | 0.022 ± 0.002       |
| C18:1-OH                    | 0.044 ± 0.01   | 0.062 ± 0.008     | 0.054 ± 0.007      | 0.054 ± 0.014      | 0.072 ± 0.019      | 0.024 ± 0.002      | 0.022 ± 0.002      | 0.04 ± 0.01        | 0.046 ± 0.008      | 0.046 ± 0.018       |
| C18-OH                      | 0.034 ± 0.004  | 0.042 ± 0.008     | 0.042 ± 0.004      | 0.044 ± 0.005      | 0.06 ± 0.009*      | 0.01 ± 0##         | 0.01 ± 0###        | 0.014 ± 0.002##    | 0.01 ± 0.003####   | 0.016 ± 0.004####   |

| Symbol | Significance                                                            |
|--------|-------------------------------------------------------------------------|
| *      | Chow vs. Keto; *p<0.05; **p<0.01; ***p<0.001; ****p<0.0001              |
| #      | Lox/Lox vs. Cpt2L-/-; #p<0.05; ##p<0.01; ###p<0.001; ####p<0.0001       |
| §      | Effect of time (day1-day5); §p<0.05; §§p<0.01; §§§p<0.001; §§§§p<0.0001 |

**Supplemental Table 2. Liver acylcarnitine profile of Cpt2lox/lox and Cpt2L<sup>-/-</sup> mice fed a chow diet or a ketogenic diet for 4 days.**

| Acylcarnitines<br>(pmol/mg) | Lox/Lox        |                  | Cpt2 <sup>L<sup>-/-</sup></sup> |                   |
|-----------------------------|----------------|------------------|---------------------------------|-------------------|
|                             | Chow           | Keto             | Chow                            | Keto              |
| Total                       | 43.41 ± 3.58   | 80.34 ± 12.9*,## | 35.23 ± 2.3                     | 30.65 ± 3.23      |
| C0                          | 179.69 ± 21.85 | 120.04 ± 24.04   | 218.07 ± 13.26                  | 79.63 ± 3.25***   |
| C2                          | 22.65 ± 1.67   | 30.83 ± 8.03     | 11.75 ± 0.9                     | 5.88 ± 1.38 #     |
| C3                          | 4.87 ± 1.02    | 2.11 ± 0.4*      | 2.17 ± 0.38#                    | 1.06 ± 0.12       |
| C3-DC                       | 1.27 ± 0.27    | 0.49 ± 0.09*     | 0.28 ± 0.03                     | 0.08 ± 0.02##     |
| C4                          | 2.36 ± 0.38    | 2.58 ± 0.46      | 0.3 ± 0.05##                    | 0.39 ± 0.03##     |
| C4-OH                       | 2.55 ± 0.61    | 1.9 ± 0.31       | 0.11 ± 0.01##                   | 0.05 ± 0.01#      |
| C4-DC                       | 0.19 ± 0.05    | 0.84 ± 0.18**    | 0.11 ± 0.06                     | 0.35 ± 0.08       |
| C5:1                        | 0.01 ± 0       | 0.01 ± 0         | 0.01 ± 0                        | 0 ± 0#            |
| C5                          | 0.31 ± 0.06    | 0.32 ± 0.07      | 0.12 ± 0.01                     | 0.03 ± 0.01##     |
| C5-OH                       | 0.15 ± 0.02    | 0.21 ± 0.04      | 0.09 ± 0.01                     | 0.01 ± 0###       |
| C5-DC/C10-OH                | 1.75 ± 0.55    | 4.79 ± 0.62*     | 4.91 ± 0.6##                    | 3.64 ± 0.56       |
| C6                          | 0.17 ± 0.04    | 0.47 ± 0.08**    | 0.1 ± 0.01                      | 0.05 ± 0.01###    |
| C8:1                        | 0.05 ± 0.01    | 0.09 ± 0.03      | 0.03 ± 0.01                     | 0.05 ± 0          |
| C8                          | 0.2 ± 0.05     | 3.74 ± 0.9***    | 0.09 ± 0.01                     | 0.1 ± 0.02###     |
| C10:1                       | 0.04 ± 0       | 0.11 ± 0.01****  | 0.03 ± 0                        | 0.06 ± 0.01##     |
| C10                         | 0.04 ± 0.01    | 0.28 ± 0.06***   | 0.03 ± 0.01                     | 0.06 ± 0.01##     |
| C12:1                       | 0.03 ± 0       | 0.23 ± 0.05***   | 0.03 ± 0.01                     | 0.06 ± 0.01##     |
| C12                         | 0.19 ± 0.03    | 1.76 ± 0.26****  | 0.18 ± 0.03                     | 0.32 ± 0.03####   |
| C12:1-OH                    | 0.09 ± 0.01    | 0.44 ± 0.06****  | 0.04 ± 0.01                     | 0.04 ± 0####      |
| C12-OH                      | 0.58 ± 0.09    | 0.98 ± 0.11*     | 0.32 ± 0.06                     | 0.28 ± 0.04###    |
| C14:2                       | 0.03 ± 0       | 0.33 ± 0.06****  | 0.06 ± 0.01                     | 0.13 ± 0.02##     |
| C14:1                       | 0.1 ± 0.01     | 1.15 ± 0.24***   | 0.15 ± 0.02                     | 0.22 ± 0.03##     |
| C14                         | 0.28 ± 0.06    | 3.36 ± 0.61****  | 0.57 ± 0.08                     | 1.22 ± 0.1##      |
| C14:1-OH                    | 0.04 ± 0.01    | 0.44 ± 0.08****  | 0.05 ± 0.01                     | 0.16 ± 0.02##     |
| C14-OH                      | 0.14 ± 0.04    | 1.13 ± 0.28**    | 0.04 ± 0.01                     | 0.04 ± 0##        |
| C16:1                       | 0.26 ± 0.07    | 1.28 ± 0.21**    | 1.37 ± 0.18###                  | 0.39 ± 0.09**,##  |
| C16                         | 1.37 ± 0.27    | 6.16 ± 0.76****  | 4.56 ± 0.51##                   | 5.16 ± 0.56       |
| C16:1-OH                    | 0.09 ± 0.01    | 0.47 ± 0.07****  | 0.09 ± 0.01                     | 0.36 ± 0.04**     |
| C16-OH                      | 0.09 ± 0.02    | 0.31 ± 0.08**    | 0.05 ± 0.01                     | 0.05 ± 0.01##     |
| C18:2                       | 0.64 ± 0.08    | 2.8 ± 0.43***    | 2.07 ± 0.19##                   | 0.82 ± 0.09*, ### |
| C18:1                       | 1.32 ± 0.27    | 6.82 ± 0.84****  | 3.84 ± 0.3#                     | 4.17 ± 0.4#       |
| C18                         | 1.37 ± 0.41    | 3.34 ± 0.43*     | 1.58 ± 0.13****                 | 5.28 ± 0.54#      |
| C18:2-OH                    | 0.05 ± 0.01    | 0.12 ± 0.02**    | 0.02 ± 0                        | 0.03 ± 0##        |
| C18:1-OH                    | 0.09 ± 0.02    | 0.3 ± 0.08*      | 0.04 ± 0.01                     | 0.07 ± 0.01#      |
| C18-OH                      | 0.06 ± 0.01    | 0.15 ± 0.02***   | 0.02 ± 0                        | 0.02 ± 0####      |

| Symbol | Significance                                                                                                      |
|--------|-------------------------------------------------------------------------------------------------------------------|
| *      | Chow vs. Keto; * <i>p</i> <0.05; ** <i>p</i> <0.01; *** <i>p</i> <0.005; **** <i>p</i> <0.001                     |
| #      | Lox/Lox vs. Cpt2L <sup>-/-</sup> ; # <i>p</i> <0.05; ## <i>p</i> <0.01; ### <i>p</i> <0.005; #### <i>p</i> <0.001 |
